# Supplementary material for: A joint application of spectroscopic, electrochemical and theoretical approaches in evaluation of the radical scavenging activity of 3-OH flavones and their iron complexes towards different radical species
Source: Royal Society of Chemistry journal article supplement (doi:10.1039/c2dt30220a), 2012-01-01
Supplement: c2dt30220a.pdf [file c2dt30220a.pdf]

## Supporting Information

### A joint application of spectroscopic, electrochemical and theoretical approaches in evaluation of the radical scavenging activity of 3-OH flavones and their iron complexes towards different radical species

Jasmina M. Dimitrić Marković<sup>\*a</sup>, Zoran S. Marković<sup>b</sup>, Igor A. Pašti<sup>a</sup>, Tanja P. Brdarić<sup>c</sup>, Ana Popović Bijelić<sup>a</sup>, Miloš Mojović<sup>a</sup>

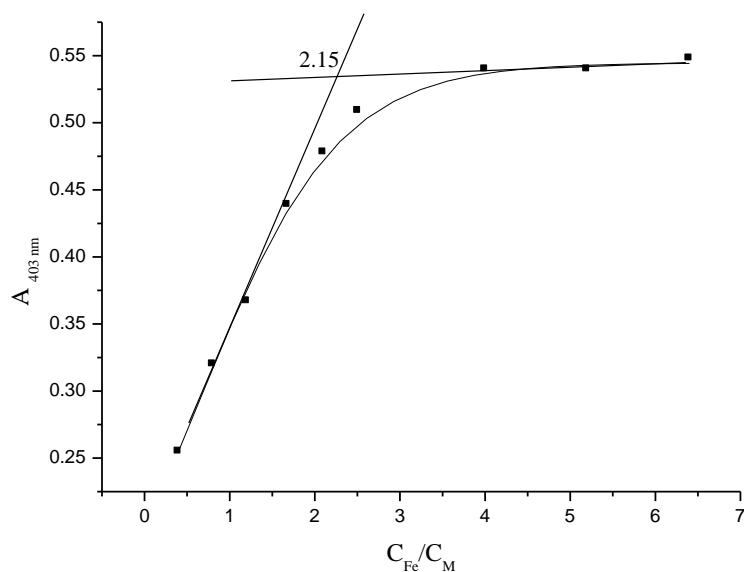

**Fig. S1** Complex absorbance at 420 nm *versus*  $[Fe]/[M]$  concentrations

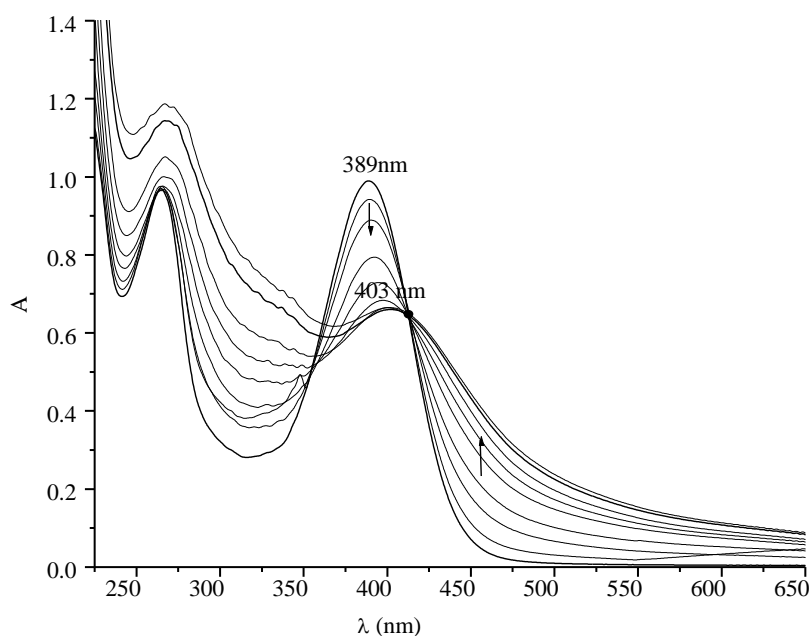

**Fig. S2** Titration curves of morin with iron(III) at pH 7

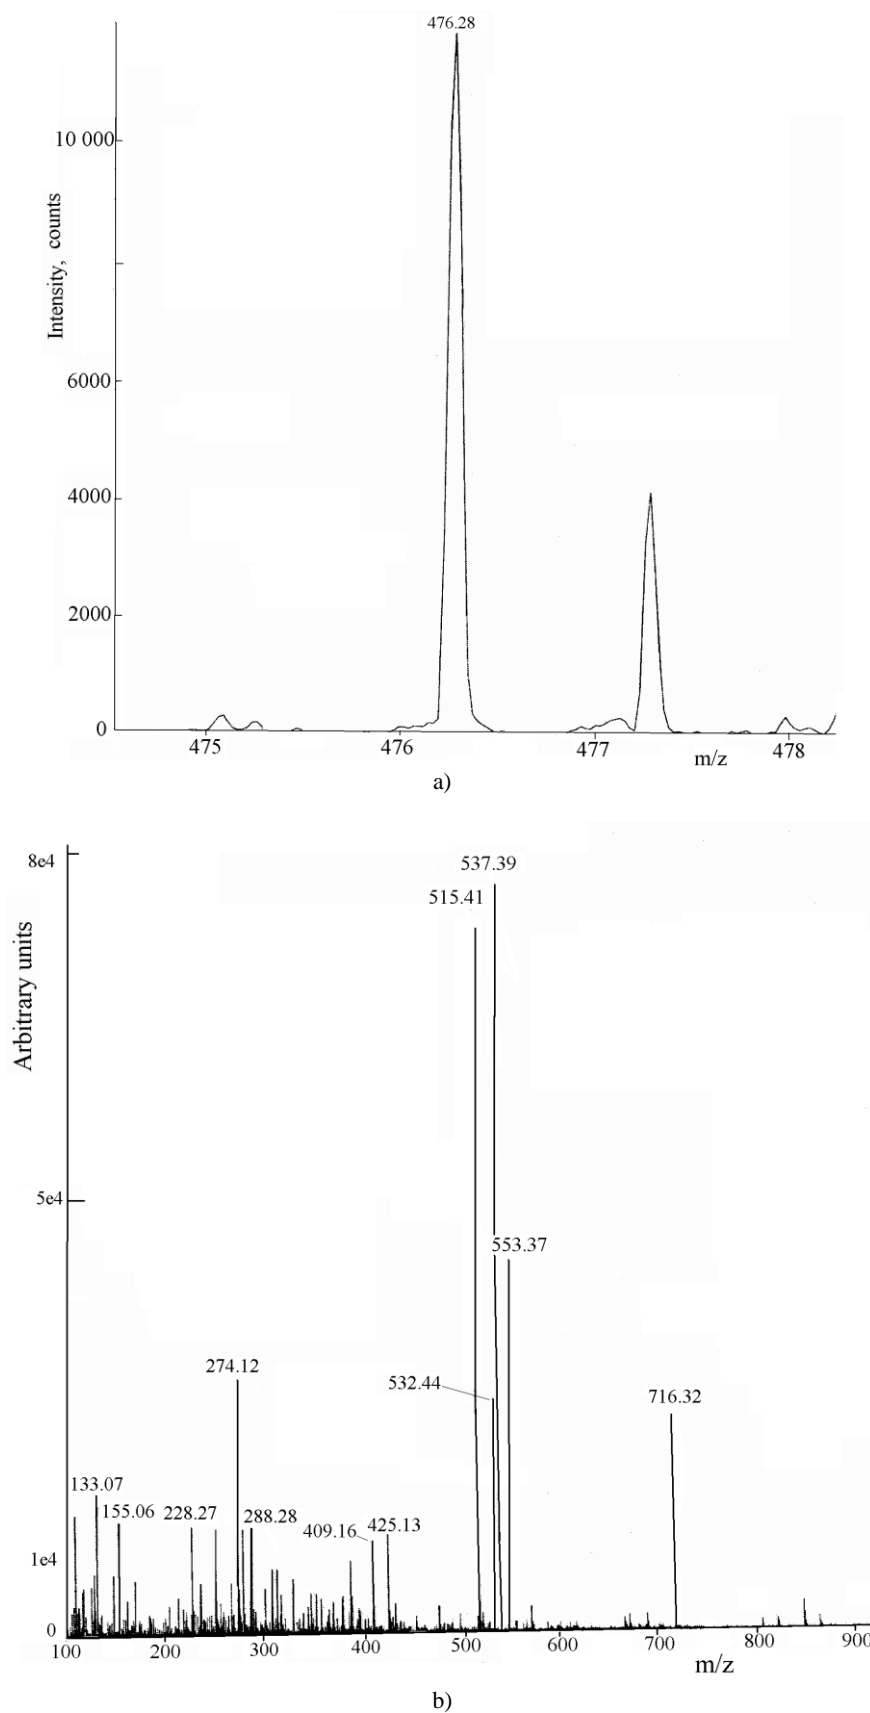

**Fig. S3** Isotopic pattern of the peak at  $m/z = 476.28$  (a) MS spectra of MeOH-H<sub>2</sub>O (1:1) mixture (b)

Table S1  
 Bond lengths (in Å) calculated for morin and corresponding iron complex

| Bond lengths     | X ray* | M052X/6-<br>311G(d,p) | Iron(II)-morin<br>complex (2:1) |
|------------------|--------|-----------------------|---------------------------------|
| C(2)-O(1)        | 1.375  | 1.365                 | 1.340                           |
| C(2)-C(3)        | 1.355  | 1.352                 | 1.406                           |
| C(2)-C(1')       | 1.464  | 1.462                 | 1.432                           |
| C(3)-C(4)        | 1.455  | 1.444                 | 1.393                           |
| C(3)-O(3)        | 1.372  | 1.365                 | 1.355                           |
| O(3)-- Fe        |        |                       | 1.822                           |
| Fe—OH-Me         |        |                       | 1.942                           |
| C(4)-C(10)       | 1.438  | 1.433                 | 1.410                           |
| C(4)-O(4)        | 1.258  | 1.244                 | 1.366                           |
| C(10)-C(5)       | 1.425  | 1.415                 | 1.428                           |
| C(10)-C(9)       | 1.396  | 1.400                 | 1.414                           |
| C(5)-C(6)        | 1.368  | 1.382                 | 1.382                           |
| C(5)-O(5)        | 1.348  | 1.334                 | 1.325                           |
| O(5)-- Fe        |        |                       | 1.800                           |
| Fe—OH-Me         |        |                       | 1.953                           |
| C(6)-C(7)        | 1.410  | 1.398                 | 1.401                           |
| C(7)-C(8)        | 1.396  | 1.390                 | 1.394                           |
| C(7)-O(7)        | 1.349  | 1.350                 | 1.331                           |
| C(8)-C(9)        | 1.386  | 1.382                 | 1.372                           |
| C(9)-O(1)        | 1.369  | 1.355                 | 1.356                           |
| C(1')-C(2')      | 1.404  | 1.407                 | 1.426                           |
| C(2')-C(3')      | 1.394  | 1.393                 | 1.386                           |
| C(2')-O(2')      | 1.370  | 1.347                 | 1.338                           |
| C(3')-C(4')      | 1.376  | 1.384                 | 1.387                           |
| C(4')-C(5')      | 1.394  | 1.397                 | 1.410                           |
| C(4')-O(4')      | 1.372  | 1.355                 | 1.329                           |
| C(5')-C(6')      | 1.378  | 1.375                 | 1.360                           |
| C(1')-C(6')      | 1.403  | 1.405                 | 1.427                           |
| O(2')-H(2')      | 1.000  | 0.970                 | 0.982                           |
| O(4')-H(4')      | 0.913  | 0.959                 | 0.962                           |
| O(3)-H(3)        | 0.845  | 0.970                 |                                 |
| O(5)-H(5)        | 0.912  | 0.979                 |                                 |
| O(7)-H(7)        | 0.877  | 0.960                 | 0.962                           |
| O(2')-H(2')---   |        |                       |                                 |
| O(3)             | 1.739  | 1.735                 | 1.566                           |
| O(3)-H(3)---O(4) |        |                       |                                 |
|                  | 2.287  | 2.031                 |                                 |
| O(5)-H(5)---O(4) |        |                       |                                 |
|                  | 1.832  | 1.782                 |                                 |

\* Data taken from ref. [28]

Table S2  
 Bond angles and dihedral angles (in °) for morin and corresponding iron complex

| Angles                       | X ray* | M052X/6-311<br>G (d,p) | Iron(II)-<br>morin<br>complex<br>(2:1) |
|------------------------------|--------|------------------------|----------------------------------------|
| O(1)-C(2)-C(3)               | 120.40 | 119.588                | 116.327                                |
| O(1)-C(2)-C(1')              | 111.20 | 112.127                | 112.831                                |
| C(3)-C(2)-C(1')              | 128.30 | 128.249                | 130.805                                |
| C(2)-C(3)-C(4)               | 121.90 | 122.230                | 120.490                                |
| C(2)-C(3)-O(3)               | 120.20 | 122.748                | 123.087                                |
| C(4)-C(3)-O(3)               | 117.70 | 115.020                | 116.313                                |
| C(3)-O(3)--Fe                |        |                        | 110.678                                |
| O(3)--Fe-- OH-Me             |        |                        | 99.352                                 |
| C(3)-C(4)-C(10)              | 115.60 | 115.896                | 121.710                                |
| C(3)-C(4)-O(4)               | 120.10 | 119.000                | 114.628                                |
| C(10)-C(4)-O(4)              | 124.30 | 125.086                | 123.654                                |
| C(4)-C(10)-C(5)              | 122.30 | 121.715                | 126.751                                |
| C(4)-C(10)-C(9)              | 119.90 | 119.468                | 115.767                                |
| C(5)-C(10)-C(9)              | 117.80 | 118.811                | 117.398                                |
| C(10)-C(5)-C(6)              | 120.30 | 119.672                | 119.310                                |
| C(10)-C(5)-O(5)              | 120.00 | 120.758                | 121.572                                |
| C(6)-C(5)-O(5)               | 119.60 | 119.570                | 119.111                                |
| C(5)-O(5)--Fe                |        |                        | 125.765                                |
| O(5)--Fe-- OH-Me             |        |                        | 93.815                                 |
| C(5)-C(6)-C(7)               | 119.90 | 119.564                | 120.927                                |
| C(6)-C(7)-C(8)               | 121.60 | 122.158                | 121.139                                |
| C(6)-C(7)-O(7)               | 121.30 | 121.170                | 122.441                                |
| C(8)-C(7)-O(7)               | 117.10 | 116.672                | 116.418                                |
| C(7)-C(8)-C(9)               | 117.10 | 117.611                | 117.648                                |
| O(1)-C(9)-C(10)              | 121.20 | 120.675                | 119.997                                |
| O(1)-C(9)-C(8)               | 115.50 | 117.141                | 116.440                                |
| C(10)-C(9)-C(8)              | 123.30 | 122.183                | 123.555                                |
| C(2)-C(1')-C(2')             | 123.90 | 123.808                | 126.011                                |
| C(2)-C(1')-C(6')             | 118.50 | 117.950                | 116.824                                |
| C(1')-C(2')-C(3')            | 120.60 | 119.635                | 120.134                                |
| C(1')-C(2')-O(2')            | 122.50 | 124.376                | 124.004                                |
| C(3')-C(2')-O(2')            | 116.80 | 115.905                | 115.807                                |
| C(2')-C(3')-C(4')            | 120.10 | 120.796                | 120.854                                |
| C(3')-C(4')-C(5')            | 120.60 | 120.375                | 120.310                                |
| C(3')-C(4')-O(4')            | 122.00 | 122.256                | 123.163                                |
| C(5')-C(4')-O(4')            | 117.30 | 117.369                | 116.525                                |
| C(4')-C(5')-C(6')            | 119.00 | 118.780                | 119.074                                |
| C(1')-C(6')-C(5')            | 122.10 | 122.279                | 122.627                                |
| C(2)-O(1)-C(9)               | 120.80 | 122.089                | 125.640                                |
| t(C(3)-C(2)-C(1')-<br>C(2')) | 43.4   | 38.269                 | 23.90                                  |

\* Data taken from ref. [28]

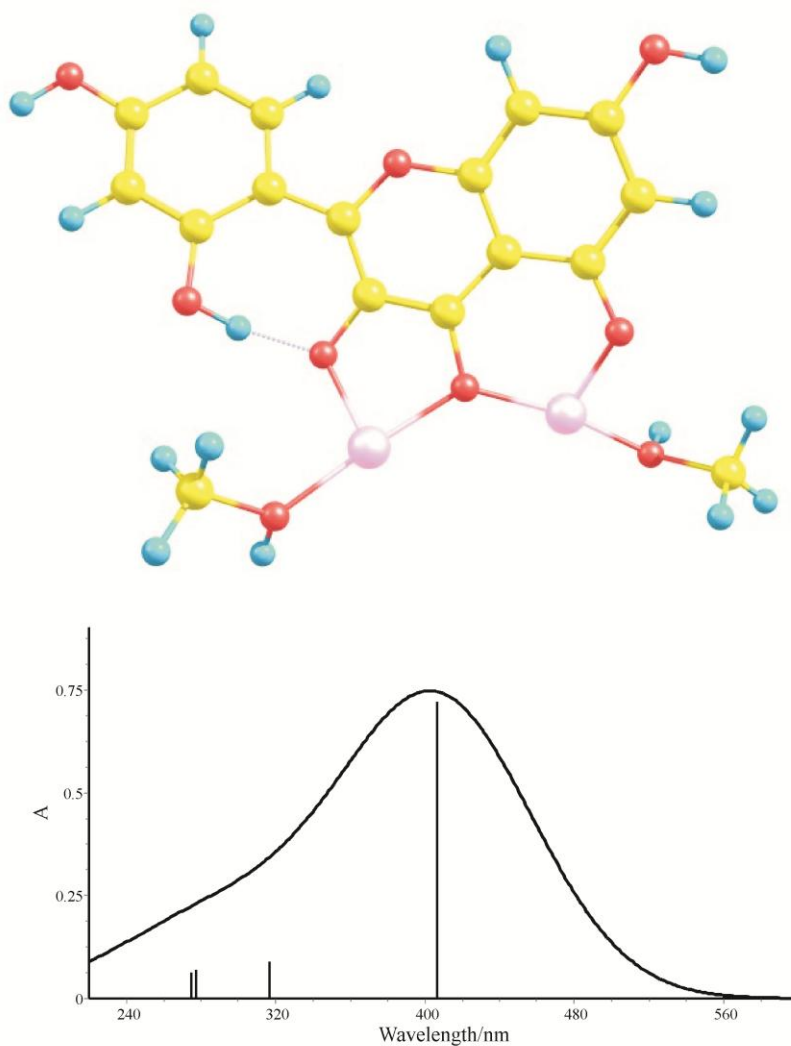

**Fig. S4** Geometrically optimized structure of the 2:1 iron(II)-morin complex (top) and the calculated electronic spectrum of the supposed complex structure (bottom)

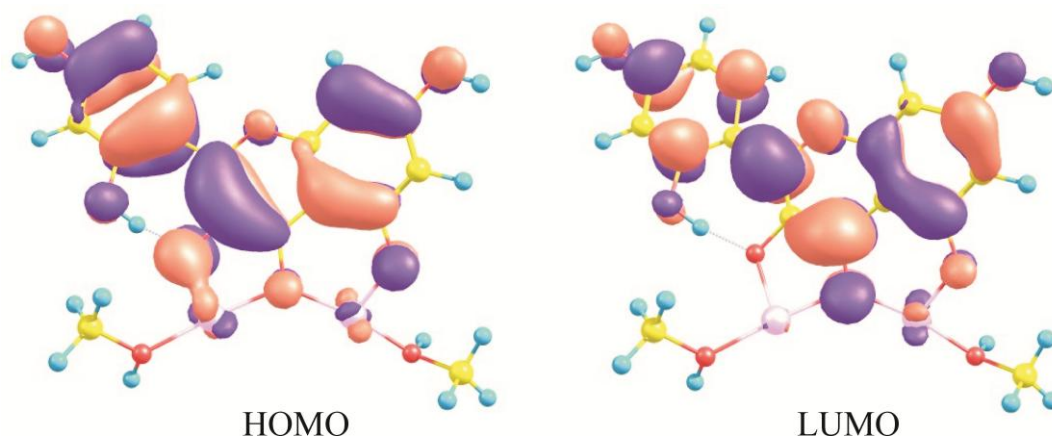

**Fig. S5** The corresponding HOMO and LUMO orbitals responsible for UV-spectrum of the 2:1 iron(II)-morin complex

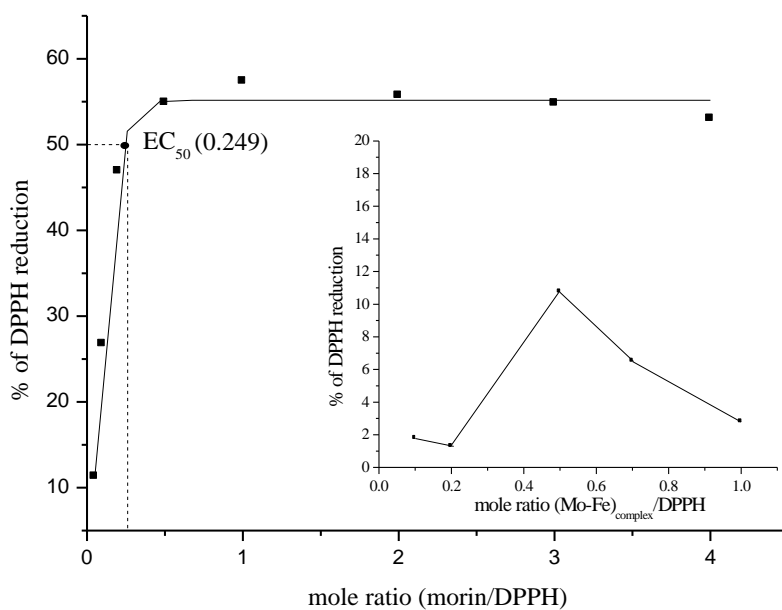

**Fig. S6** Percentage of the DPPH (0.05 mM) reduction as a function of different morin/DPPH mol ratios. Inset: Percentage of DPPH reduction as a function of different (morin-Fe)/DPPH mole ratios

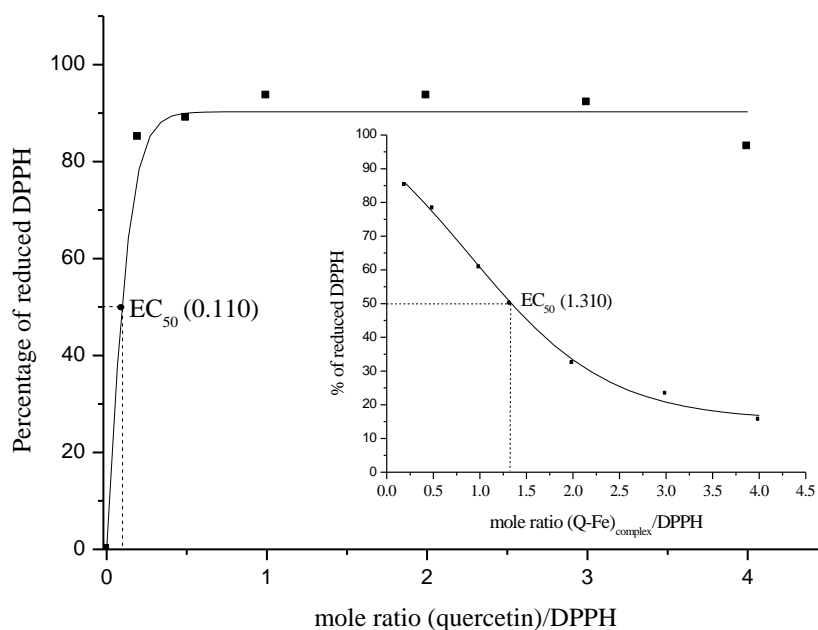

**Fig. S7** Percentage of the DPPH (0.05 mM) reduction as a function of different quercetin/DPPH mole ratios. Inset: Percentage of DPPH reduction as a function of different (quercetin-Fe)/DPPH mole ratios

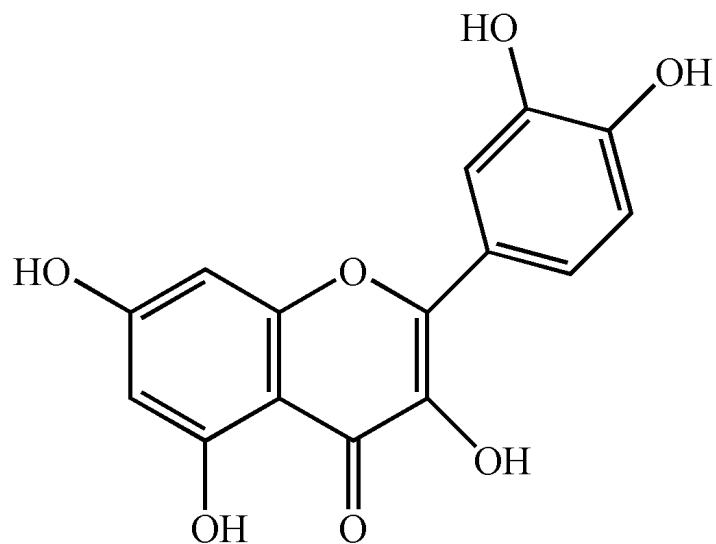

**Fig. S8** Structure of quercetin

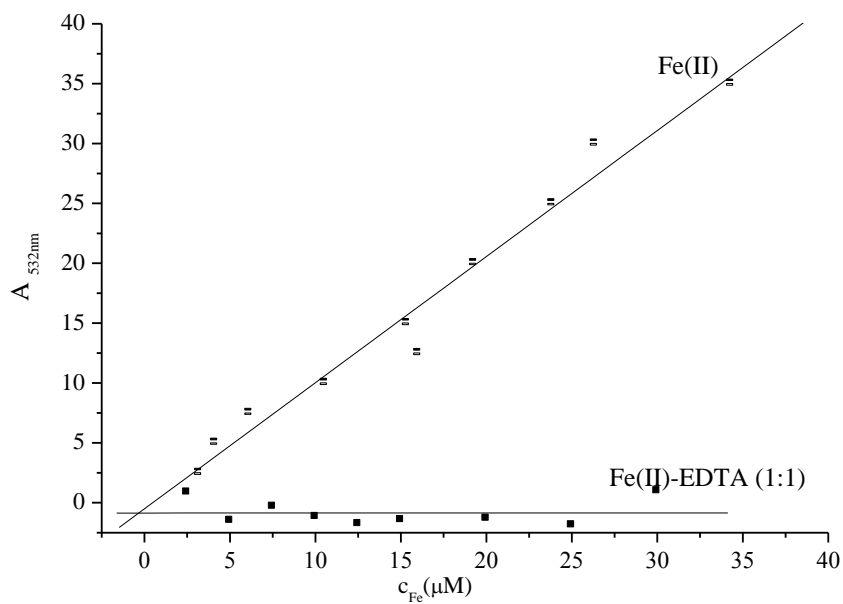

**Fig. S9** Absorbance of malonaldehyde–TBA complex at 532 nm at various Fe(II) concentrations in the absence and presence of equimolar EDTA

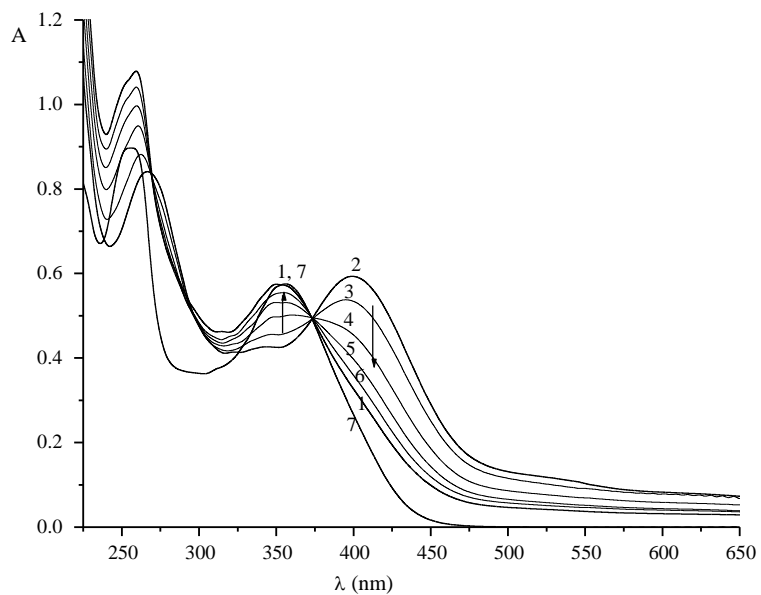

**Fig. S10** Morin recovery from iron-morin complex (pH 4) by EDTA (1-morin; 2: iron-morin complex without EDTA; 3: complex + 1.0  $\mu\text{M}$  EDTA; 4: complex + 1.5  $\mu\text{M}$  EDTA; 5: complex + 3.1  $\mu\text{M}$  EDTA 6: complex + 4.8  $\mu\text{M}$  EDTA 7: complex + 6.5 mM EDTA )

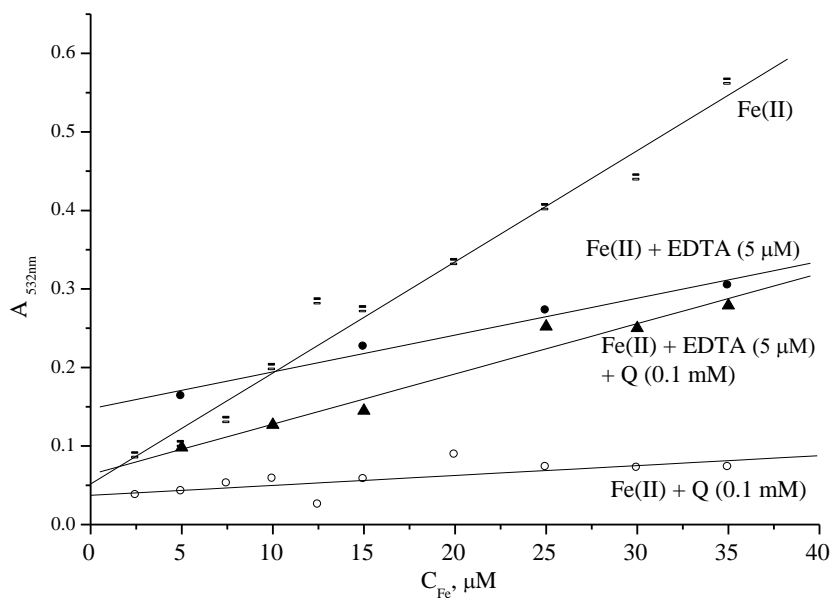

**Fig. S11** Absorbance of malonaldehyde-TBA complex at 532 nm: at various Fe(II) concentrations in the presence or absence of quercetin and EDTA
